# Supplementary material for: Alkali-metal-regulated construction of superhydrophilic ZnII and CdII coordination polymers with perhalogenated terephthalate ligands
Source: Royal Society of Chemistry journal article supplement (doi:10.1039/c3ce41108g), 2013-01-01

## Electronic Supplementary Information

### Alkali-metal-regulated construction of suprahydrophilic Zn<sup>II</sup> and Cd<sup>II</sup> coordination polymers with perhalogenated terephthalate ligands

Sheng-Chun Chen,<sup>a</sup> Zhi-Hui Zhang,<sup>a</sup> Kun-Lin Huang,<sup>b</sup> Hai-Kun Luo,<sup>a</sup> Ming-Yang He,<sup>a</sup>  
Miao Du<sup>\*c</sup> and Qun Chen,<sup>\*a</sup>

<sup>a</sup> School of Petrochemical Engineering, Key Laboratory of Fine Petro-chemical Technology,  
Changzhou University, Changzhou 213164, P. R. China. E-mail: chenqunjpu@yahoo.com.

<sup>b</sup> College of Chemistry, Chongqing Normal University, Chongqing 401331, P. R. China

<sup>b</sup> College of Chemistry, Tianjin Key Laboratory of Structure and Performance for Functional  
Molecular, Tianjin Normal University, Tianjin 300387, P. R. China. E-mail:  
dumiao@public.tpt.tj.cn

## **Contents**

|                                                                                                                                                                          |     |
|--------------------------------------------------------------------------------------------------------------------------------------------------------------------------|-----|
| (1) The selected bond distances and angles for complexes <b>1–6</b> ( <b>Table S1</b> ).....                                                                             | 3~5 |
| (2) Possible hydrogen-bonding interactions in the crystal structures of complexes <b>1–6</b> ( <b>Table S2</b> ).....                                                    | 6~7 |
| (3) The coordination environment of Zn <sup>II</sup> ion in complex <b>3</b> ( <b>Fig. S1</b> ).....                                                                     | 8   |
| (4) The coordination environment of Na <sup>I</sup> ion in complex <b>3</b> ( <b>Fig. S2</b> ).....                                                                      | 8   |
| (5) The tetranuclear cluster [Zn <sub>2</sub> Na <sub>2</sub> (-COO) <sub>6</sub> (μ <sub>2</sub> -MeOH)(DMF) <sub>4</sub> ] in complex <b>3</b> ( <b>Fig. S3</b> )..... | 9   |
| (6) The coordination environment of Zn <sup>II</sup> ion in complex <b>4</b> ( <b>Fig. S4</b> ).....                                                                     | 9   |
| (7) The coordination environment of K <sup>I</sup> ion in complex <b>4</b> ( <b>Fig. S5</b> ).....                                                                       | 10  |
| (8) The connecting mode of two centralsymmetry-related K <sup>I</sup> ions in complex <b>4</b> ( <b>Fig. S6</b> ).....                                                   | 10  |
| (9) The IR spectra of complexes <b>1–6</b> ( <b>Fig. S7</b> ) .....                                                                                                      | 11  |
| (10) Simulated and experimental X-ray powder diffraction patterns for complexes <b>1–6</b> ( <b>Fig. S8</b> ).....                                                       | 11  |
| (11) TGA curves of complexes <b>1–6</b> ( <b>Fig. S9</b> ) .....                                                                                                         | 12  |
| (12) Emission spectra of the free ligands H <sub>2</sub> BDC-F <sub>4</sub> and H <sub>2</sub> BDC-Cl <sub>4</sub> ( <b>Fig. S10</b> ).....                              | 12  |

**Table S1.** The selected bond distances (Å) and angles (deg) for complexes **1–6**<sup>a</sup>

| Complex <b>1</b> |          |               |          |               |          |
|------------------|----------|---------------|----------|---------------|----------|
| Cd1–O1           | 2.278(4) | Cd1–O3#1      | 2.476(5) | Cd1–O4#1      | 2.466(4) |
| Cd1–O4#2         | 2.446(4) | Cd1–O5        | 2.372(4) | Cd1–O7        | 2.238(4) |
| Cd1–O8           | 2.295(4) | Cd2–O6        | 2.272(4) | Cd2–O9        | 2.286(5) |
| Cd2–O10          | 2.317(5) |               |          |               |          |
| O1–Cd1–O3#1      | 160.8(2) | O1–Cd1–O4#1   | 147.3(2) | O1–Cd1–O4#2   | 83.3(1)  |
| O1–Cd1–O5        | 86.9(2)  | O1–Cd1–O7     | 89.8(1)  | O1–Cd1–O8     | 88.8(1)  |
| O3#1–Cd1–O4#1    | 51.6(2)  | O3#1–Cd1–O4#2 | 115.8(2) | O3#1–Cd1–O5   | 74.1(2)  |
| O3#1–Cd1–O7      | 89.0(2)  | O3#1–Cd1–O8   | 89.6(2)  | O4#1–Cd1–O4#2 | 64.6(1)  |
| O4#1–Cd1–O5      | 123.8(1) | O4#1–Cd1–O7   | 98.0(2)  | O4#1–Cd1–O8   | 87.2(1)  |
| O4#2–Cd1–O5      | 166.8(2) | O4#2–Cd1–O7   | 94.4(2)  | O4#2–Cd1–O8   | 93.6(1)  |
| O5–Cd1–O7        | 94.3(1)  | O5–Cd1–O8     | 77.5(1)  | O7–Cd1–O8     | 171.6(2) |
| O6–Cd2–O6#3      | 180.0(3) | O6–Cd2–O9     | 89.8(2)  | O6–Cd2–O9#3   | 90.2(1)  |
| O6–Cd2–O10       | 90.4(2)  | O6–Cd2–O10#3  | 89.6(2)  | O9–Cd2–O9#3   | 180.0(3) |
| O9–Cd2–O10       | 88.1(2)  | O9–Cd2–O10#3  | 91.9(2)  | O10–Cd2–O10#3 | 180.0(2) |
| Complex <b>2</b> |          |               |          |               |          |
| Cd1–O1           | 2.263(2) | Cd1–O3        | 2.315(2) | Cd1–O4        | 2.314(2) |
| O1–Cd1–O1#4      | 180.0(1) | O1–Cd1–O3     | 93.78(9) | O1–Cd1–O3#4   | 86.22(9) |
| O1–Cd1–O4        | 88.45(8) | O1–Cd1–O4#4   | 91.55(8) | O3–Cd1–O3#4   | 180.0(1) |
| O3–Cd1–O4        | 91.70(9) | O3–Cd1–O4#4   | 88.30(9) | O4–Cd1–O4#4   | 180.0(2) |
| Complex <b>3</b> |          |               |          |               |          |
| Zn1–O1           | 1.958(4) | Zn1–O3#5      | 1.985(5) | Zn1–O6        | 1.932(4) |
| Zn1–O7           | 2.010(4) | Na1–O2        | 2.311(5) | Na1–O3#5      | 2.489(6) |
| Na1–O5           | 2.361(4) | Na1–O5#6      | 2.410(5) | Na1–O8        | 2.320(5) |
| Na1–O9           | 2.416(6) |               |          |               |          |
| O1–Zn1–O3#5      | 107.9(2) | O1–Zn1–O6     | 116.9(2) | O1–Zn1–O7     | 93.9(2)  |
| O3#5–Zn1–O6      | 107.3(2) | O3#5–Zn1–O7   | 134.6(2) | O6–Zn1–O7     | 96.5(2)  |
| O2–Na1–O3#5      | 81.5(2)  | O2–Na1–O5     | 98.2(2)  | O2–Na1–O5#6   | 98.8(2)  |

|               |          |             |          |             |          |
|---------------|----------|-------------|----------|-------------|----------|
| O2–Na1–O8     | 94.1(2)  | O2–Na1–O9   | 176.2(2) | O3#5–Na1–O5 | 82.3(2)  |
| O3#5–Na1–O5#6 | 165.7(2) | O3#5–Na1–O8 | 93.9(2)  | O3#5–Na1–O9 | 100.7(2) |
| O5–Na1–O5#6   | 83.5(2)  | O5–Na1–O8   | 166.4(2) | O5–Na1–O9   | 79.2(2)  |
| O5#6–Na1–O8   | 100.3(2) | O5#6–Na1–O9 | 78.2(2)  | O8–Na1–O9   | 88.8(2)  |

#### Complex 4

|               |          |             |          |               |           |
|---------------|----------|-------------|----------|---------------|-----------|
| Zn1–O1        | 1.967(2) | Zn1–O3      | 1.951(2) | Zn1–O5        | 1.984(3)  |
| Zn1–N2        | 2.015(3) | K1–O1       | 2.867(2) | K1–O4         | 2.784(3)  |
| K1–O4#7       | 3.044(4) | K1–O6       | 2.696(3) | K1–O6#7       | 2.709(3)  |
| K1–O7         | 2.625(4) | K1–Cl1      | 3.608(2) | K1–Cl4#8      | 3.622(1)  |
| O1–Zn1–O3     | 111.3(1) | O1–Zn1–O5   | 110.2(1) | O1–Zn1–N2     | 118.0 (1) |
| O3–Zn1–O5     | 118.9(1) | O3–Zn1–N2   | 97.3(1)  | O5–Zn1–N2     | 100.6(1)  |
| O1–K1–O4      | 74.7(1)  | O1–K1–O4#7  | 138.1(1) | O1–K1–O6      | 75.8(1)   |
| O1–K1–O6#7    | 144.0(1) | O1–K1–O7    | 87.2(1)  | O1–K1–Cl1     | 58.4(1)   |
| O1–K1–Cl4#8   | 125.4(1) | O4–K1–O4#7  | 104.6(1) | O4–K1–O6      | 65.6(1)   |
| O4–K1–O6#7    | 70.4(1)  | O4–K1–O7    | 113.7(1) | O4–K1–Cl1     | 129.2(1)  |
| O4–K1–Cl4#8   | 159.6(1) | O4#7–K1–O6  | 66.7(1)  | O4#7–K1–O6#7  | 61.9(1)   |
| O4#7–K1–O7    | 127.7(1) | O4#7–K1–Cl1 | 98.3(1)  | O4#7–K1–Cl4#8 | 63.1(1)   |
| O6–K1–O6#7    | 97.3(1)  | O6–K1–O7    | 162.6(1) | O6–K1–Cl1     | 83.7(1)   |
| O6–K1–Cl4#8   | 118.0(1) | O6#7–K1–O7  | 98.6(2)  | O6#7–K1–Cl1   | 157.1(1)  |
| O6#7–K1–Cl4#8 | 89.2(1)  | O7–K1–Cl1   | 84.2(1)  | O7–K1–Cl4#8   | 69.0(1)   |
| Cl1–K1–Cl4#8  | 70.4(1)  |             |          |               |           |

#### Complex 5

|             |          |             |          |             |          |
|-------------|----------|-------------|----------|-------------|----------|
| Cd1–O1      | 2.345(4) | Cd1–O2      | 2.287(4) | Cd1–O2W     | 2.171(4) |
| Cd1–O4W     | 2.431(4) | Cd1–O5W     | 2.357(4) | Cd1–O6W     | 2.363(4) |
| Cd1–O7W     | 2.395(8) | Cd2–O1W     | 2.176(5) | Cd2–O4W     | 2.296(4) |
| Cd2–O5      | 2.409(4) | Cd2–O5W     | 2.442(4) | Cd3–O3W     | 2.287(5) |
| Cd3–O6W     | 2.385(4) | Cd3–O7      | 2.399(4) | Cd3–O7W     | 2.417(9) |
| O1–Cd1–O2   | 55.3(1)  | O1–Cd1–O2W  | 151.7(1) | O1–Cd1–O4W  | 74.2(2)  |
| O1–Cd1–O5W  | 87.2(2)  | O1–Cd1–O6W  | 105.6(1) | O1–Cd1–O7W  | 126.9(2) |
| O2–Cd1–O2W  | 152.9(2) | O2–Cd1–O4W  | 128.2(1) | O2–Cd1–O5W  | 106.9(1) |
| O2–Cd1–O6W  | 86.7(1)  | O2–Cd1–O7W  | 72.5(2)  | O2W–Cd1–O4W | 77.9(2)  |
| O2W–Cd1–O5W | 82.7(1)  | O2W–Cd1–O6W | 82.6(2)  | O2W–Cd1–O7W | 81.1(2)  |

|               |          |               |          |               |          |
|---------------|----------|---------------|----------|---------------|----------|
| O4W–Cd1–O5W   | 79.1(1)  | O4W–Cd1–O6W   | 97.1(1)  | O4W–Cd1–O7W   | 158.9(2) |
| O5W–Cd1–O6W   | 165.3(1) | O5W–Cd1–O7W   | 100.0(2) | O6W–Cd1–O7W   | 78.4(2)  |
| O1W–Cd2–O4W   | 85.1(1)  | O1W–Cd2–O5    | 152.2(1) | O1W–Cd2–O5W   | 80.4(1)  |
| O4W–Cd2–O4W#9 | 170.2(2) | O4W–Cd2–O5    | 86.7(1)  | O4W–Cd2–O5#9  | 102.1(1) |
| O4W–Cd2–O5W   | 80.1(1)  | O4W–Cd2–O5W#9 | 98.3(1)  | O5–Cd2–O5#9   | 55.5(2)  |
| O5–Cd2–O5W    | 72.0(1)  | O5–Cd2–O5W#9  | 127.1(1) | O5W–Cd2–O5W#9 | 160.9(2) |
| O3W–Cd3–O6W   | 77.9(2)  | O3W–Cd3–O7    | 153.0(1) | O3W–Cd3–O7W   | 79.8(2)  |
| O6W–Cd3–O6W#6 | 155.9(2) | O6W–Cd3–O7    | 120.3(1) | O6W–Cd3–O7#6  | 82.3(1)  |
| O6W–Cd3–O7W   | 77.6(2)  | O6W–Cd3–O7W#6 | 98.1(2)  | O7–Cd3–O7#6   | 54.0(2)  |
| O7–Cd3–O7W    | 121.5(2) | O7–Cd3–O7W#6  | 78.1(2)  | O7W–Cd3–O7W#6 | 159.6(4) |

Complex **6**

|              |          |              |          |              |          |
|--------------|----------|--------------|----------|--------------|----------|
| Zn1–O3       | 2.080(5) | Zn1–O4       | 2.061(5) | Zn1–O5       | 2.117(5) |
| O3–Zn1–O3#10 | 180.0(3) | O3–Zn1–O4    | 92.6 (2) | O3–Zn1–O4#10 | 87.4(2)  |
| O3–Zn1–O5    | 86.2(2)  | O3–Zn1–O5#10 | 93.8(2)  | O4–Zn1–O4#10 | 180.0(1) |
| O4–Zn1–O5    | 87.2(2)  | O4–Zn1–O5#10 | 92.8(2)  | O5–Zn1–O5#10 | 180.0(1) |

<sup>a</sup> Symmetry transformations used to generate equivalent atoms: For **1**, #1:  $-x + 1, -y + 1, -z + 1$ ; #2:  $x, y + 1, z$ ; #3:  $-x + 2, -y, -z$ ; For **2**, #4:  $-x, -y, -z$ ; For **3**, #5:  $-x + 1/2, y + 1/2, -z + 1/2$ ; #6:  $-x, y, -z + 1/2$ ; For **4**, #7:  $-x + 1, -y + 2, -z + 1$ ; #8:  $x + 1/2, -y + 3/2, z + 1/2$ ; For **5**, #9:  $-x + 1, y, -z + 1/2$ ; For **6**, #10:  $-x, -y + 2, -z$ .

**Table S2.** Possible hydrogen-bonding interactions in the crystal structures of  
 complexes **1–6**

| Complex  | D–H...A       | H...A (Å) | D...A (Å) | D–H...A (°) | Symmetry code                 |
|----------|---------------|-----------|-----------|-------------|-------------------------------|
| <b>1</b> | O8–H8...O2    | 1.79      | 2.569(7)  | 159         |                               |
|          | O9–H9...O5    | 2.23      | 2.775(7)  | 125         | $-x + 2, -y, -z$              |
|          | O9–H9...O8    | 2.57      | 3.142(7)  | 128         | $-x + 2, -y, -z$              |
|          | C13–H13...O1  | 2.55      | 3.193(9)  | 127         |                               |
|          | C15–H15A...O7 | 2.33      | 2.74(1)   | 105         |                               |
|          | C15–H15C...O2 | 2.56      | 3.52(1)   | 179         | $x - 1, y, z$                 |
| <b>2</b> | O4–H4A...O2   | 1.93      | 2.687(3)  | 153         | $-x, -y, -z$                  |
|          | O4–H4B...O1   | 2.50      | 3.137(3)  | 136         | $-x + 1, -y, -z$              |
|          | O4–H4B...O3   | 2.47      | 3.131(3)  | 139         | $x + 1, y, z$                 |
|          | C7–H7A...O3   | 2.40      | 2.790(6)  | 104         |                               |
| <b>3</b> | C13–H13...O4  | 2.24      | 2.96(1)   | 135         | $-x + 1/2, y - 1/2, -z + 1/2$ |
|          | C15–H15A...O7 | 2.32      | 2.74(1)   | 106         |                               |
|          | C18–H18A...O8 | 2.37      | 2.79(1)   | 106         |                               |
| <b>4</b> | N2–H2...O2    | 2.10      | 2.881(5)  | 152         | $-x + 1, -y + 2, -z$          |
| <b>5</b> | O1W–H1X...O1  | 2.00      | 2.783(5)  | 137         | $-x + 1, y, -z + 1/2$         |
|          | O1W–H1Y...O1  | 2.01      | 2.783(5)  | 136         |                               |
|          | O2W–H2X...O7  | 2.10      | 2.708(6)  | 128         | $-x, y, -z + 1/2$             |
|          | O2W–H2Y...O5  | 1.91      | 2.744(6)  | 167         |                               |
|          | O3W–H3X...O2  | 2.24      | 2.763(5)  | 113         | $-x, y, -z + 1/2$             |
|          | O3W–H3X...O4  | 2.56      | 3.377(4)  | 143         | $x - 1/2, -y + 3/2, z - 1/2$  |
|          | O3W–H3Y...O2  | 1.84      | 2.763(5)  | 161         |                               |

|          |               |      |          |     |                               |
|----------|---------------|------|----------|-----|-------------------------------|
|          | O4W–H4X...O10 | 2.13 | 2.977(1) | 172 |                               |
|          | W             |      |          |     |                               |
|          | O4W–H4Y...O6  | 1.80 | 2.640(6) | 170 | $-x + 1, -y + 2, -z + 1$      |
|          | O5W–H5X...O8W | 2.30 | 3.143(9) | 173 | $x, y, z - 1$                 |
|          | O5W–H5Y...O3  | 1.82 | 2.659(6) | 169 | $-x + 1/2, -y + 3/2, -z$      |
|          | O6W–H6X...O8W | 2.21 | 3.058(9) | 176 |                               |
|          | O6W–H6Y...O4  | 1.91 | 2.758(6) | 176 | $-x + 1/2, -y + 3/2, -z + 1$  |
|          | O7W–H7X...O9W | 1.68 | 2.503(9) | 161 | $x, y, z - 1$                 |
|          | O7W–H7Y...O8  | 1.94 | 2.786(9) | 175 | $x, -y + 2, z - 1/2$          |
|          | O8W–H8X...F7  | 2.46 | 3.193(9) | 145 |                               |
|          | O8W–H8X...F6  | 2.01 | 2.541(9) | 120 | $-x + 1, -y + 2, -z + 1$      |
|          | O8W–H8Y...F8  | 2.40 | 3.098(9) | 140 | $x, -y + 2, z + 1/2$          |
|          | O8W–H8Y...O8  | 1.97 | 2.603(9) | 131 | $x, -y + 2, z + 1/2$          |
|          | O9W–H9X...O4  | 2.01 | 2.685(5) | 135 | $-x + 1/2, -y + 3/2, -z + 1$  |
|          | O9W–H9Y...O4  | 2.34 | 2.685(5) | 104 | $x - 1/2, -y + 3/2, z + 1/2$  |
| <b>6</b> | O3–H3A...O6   | 2.10 | 2.877(7) | 152 | $x + 1/2, -y + 3/2, z - 1/2$  |
|          | O3–H3B...O2   | 1.92 | 2.687(7) | 150 | $x, y + 1, z$                 |
|          | O4–H4A...O1   | 1.99 | 2.768(7) | 153 | $-x, -y + 1, -z$              |
|          | O4–H4B...O5   | 2.16 | 2.980(7) | 161 | $-x + 1, -y + 2, -z$          |
|          | O5–H5A...O6   | 1.96 | 2.757(7) | 156 | $-x + 1/2, y + 1/2, -z + 1/2$ |
|          | O5–H5B...O7   | 1.87 | 2.670(7) | 157 | $x, y + 1, z$                 |
|          | O6–H6A...O2   | 2.12 | 2.966(7) | 176 | $x + 1/2, -y + 1/2, z + 1/2$  |
|          | O6–H6B...O1   | 1.98 | 2.811(7) | 166 | $-x, -y + 1, -z + 1$          |
|          | O7–H7A...O1   | 2.29 | 3.060(7) | 152 |                               |
|          | O7–H7B...O2   | 1.97 | 2.802(7) | 167 | $-x + 1/2, y + 1/2, -z + 1/2$ |





**Fig. S3.** The tetranuclear cluster  $[\text{Zn}_2\text{Na}_2(-\text{COO})_6(\mu_2\text{-MeOH})(\text{DMF})_4]$  in complex **3**.

Symmetric codes: (1)  $-x, y, -z + 1/2$ ; (2)  $-x + 1/2, y - 1/2, -z + 1/2$ .

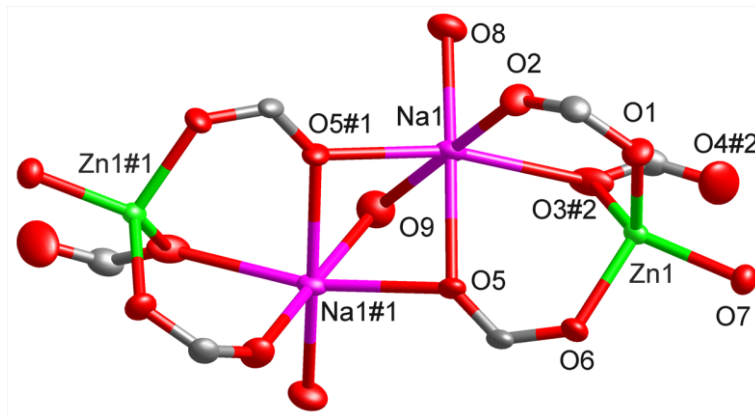

**Fig. S4.** The coordination environment of  $\text{Zn}^{\text{II}}$  ion in complex **4**.

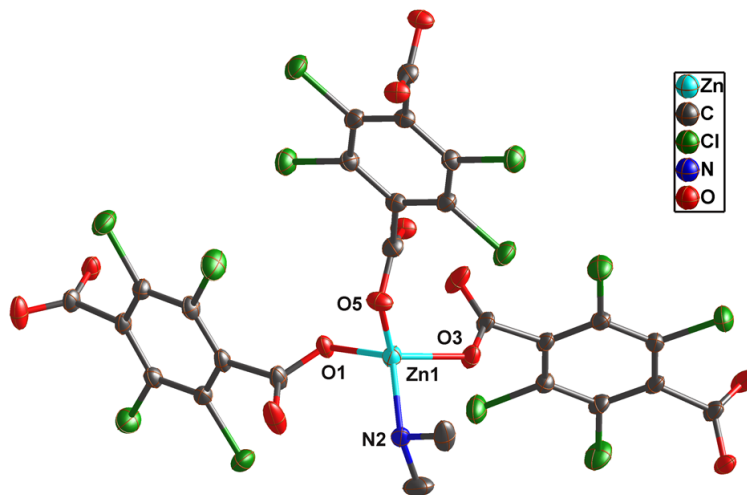

**Fig. S5.** The coordination environment of  $K^I$  ion in complex **4**.

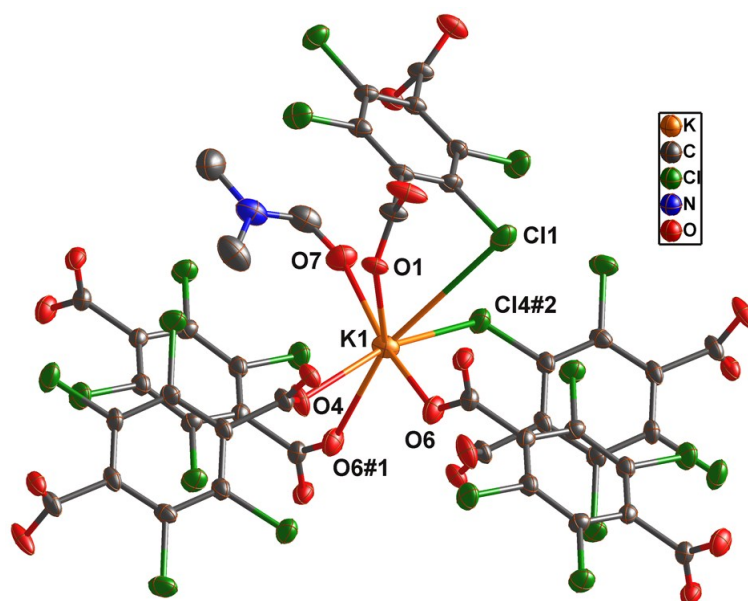

**Fig. S6.** The connecting mode of two centralsymmetry-related  $K^I$  ions in complex **4**.

Symmetric codes: (1)  $-x + 1, -y + 2, -z + 1$ ; (2)  $x + 1/2, -y + 3/2, z + 1/2$ .

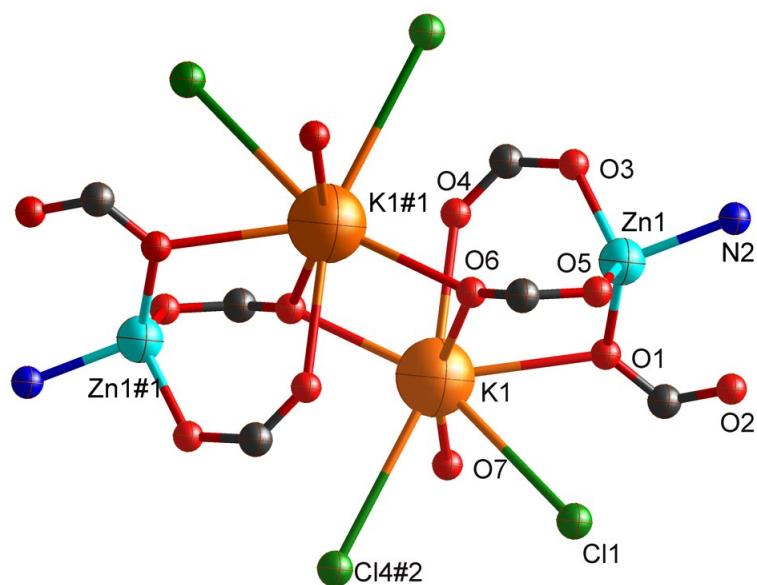

**Fig. S7.** The IR spectra of complexes 1–6.

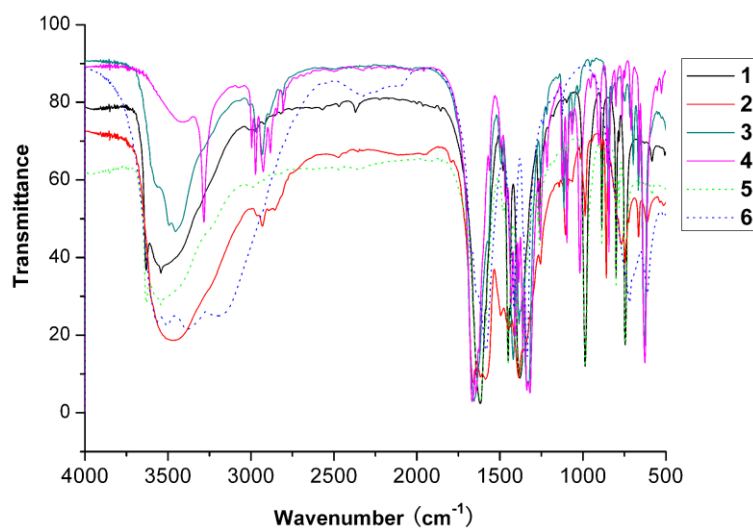

**Fig. S8.** Simulated (blue) and experimental (red) X-ray powder diffraction patterns of complexes 1–6.

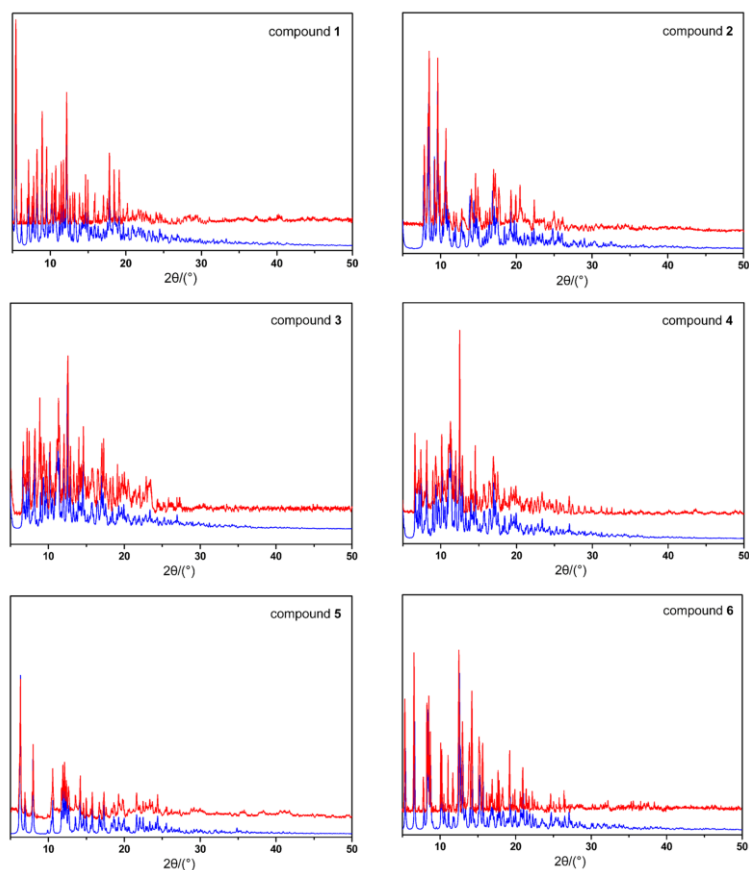

**Fig. S9.** TGA curves of complexes 1–6.

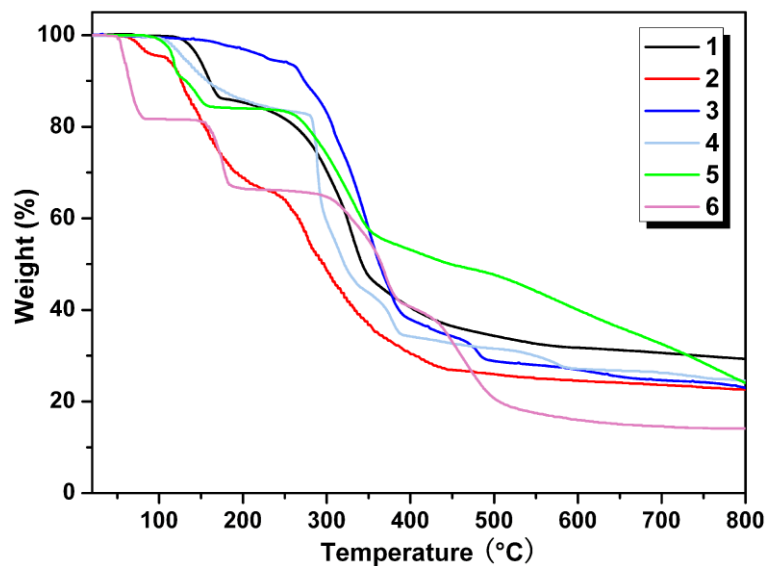

**Fig. S10.** Emission spectra of the free ligands  $\text{H}_2\text{BDC-F}_4$  and  $\text{H}_2\text{BDC-Cl}_4$  in the solid state at room temperature.

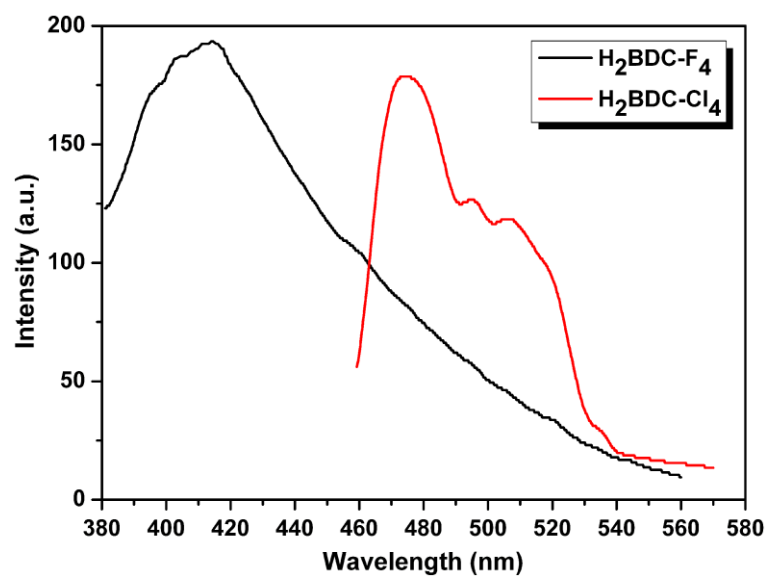

Supplement: c3ce41108g.pdf [file c3ce41108g.pdf]
